# Supplementary material for: Microglia-derived iron-overloaded exosomes induce neuronal ferroptosis and aggravate neurological impairment after subarachnoid hemorrhage
Source: Research Square preprint supplement (doi:10.21203/rs.3.rs-7693386/v1), 2025-10-15
Supplement: Supplementary file 1 [file 77055867d2202486cf71454f.docx]

**Supplementary Methods**

In the ART, adhesive tape dots (4 mm in diameter) were applied to the plantar surface of both forepaws. Mice were then individually placed in a transparent observation chamber, and two latency times were recorded: the time to first contact (detection time) and the time to complete removal (removal time) of the adhesive. A maximum cut-off time of 120 seconds was set.

In the RT, mice were placed on an accelerating rotarod apparatus, which increased speed from 4 to 40 rotations per minute (rpm) over a 5-minute period. The latency to fall was recorded for each trial, with a maximum cut-off time of 300 seconds (s). Each mouse underwent three trials per day with at least 20 minutes (min) intervals between trials. The average latency across trials was used for analysis.

The NORT consisted of two phases: familiarization, and test. During familiarization, two identical objects were placed in the arena, and mice were allowed to explore for 5 min. After a retention interval (typically 4 hours (h)), one familiar object was replaced with a novel object of similar size, and mice were reintroduced to the arena for a 5-min test session. Object exploration time was recorded, and a discrimination index was calculated to assess recognition memory.

In the Y-Maze test, the Y-shaped maze consisted of three arms (typically 30 cm long and 120° apart). Each mouse was placed at the end of one arm and allowed to freely explore all three arms for 8 min. Arm entries were recorded, and spontaneous alternation was defined as consecutive entries into all three arms without repetition. The percentage of spontaneous alternations was calculated as the number of alternations divided by the total number of possible alternations (total arm entries minus two), multiplied by 100%.

In the OFT, each mouse was individually placed in the center of a square open-field arena (typically 40 cm × 40 cm × 40 cm) with opaque walls and a clear floor. Behavior was recorded for 5 min using an automated tracking system. Key parameters analyzed included total distance traveled, time spent in the center and time spent motionless.

In the GT, each mouse was allowed to grasp a metal grid or bar connected to a digital force gauge and was gently pulled backward by the tail in a horizontal plane until it released its grip. The peak force (in grams) was recorded. Each mouse underwent three consecutive trials with sufficient rest between trials, and the average value was used for analysis.

**Supplementary Figures**


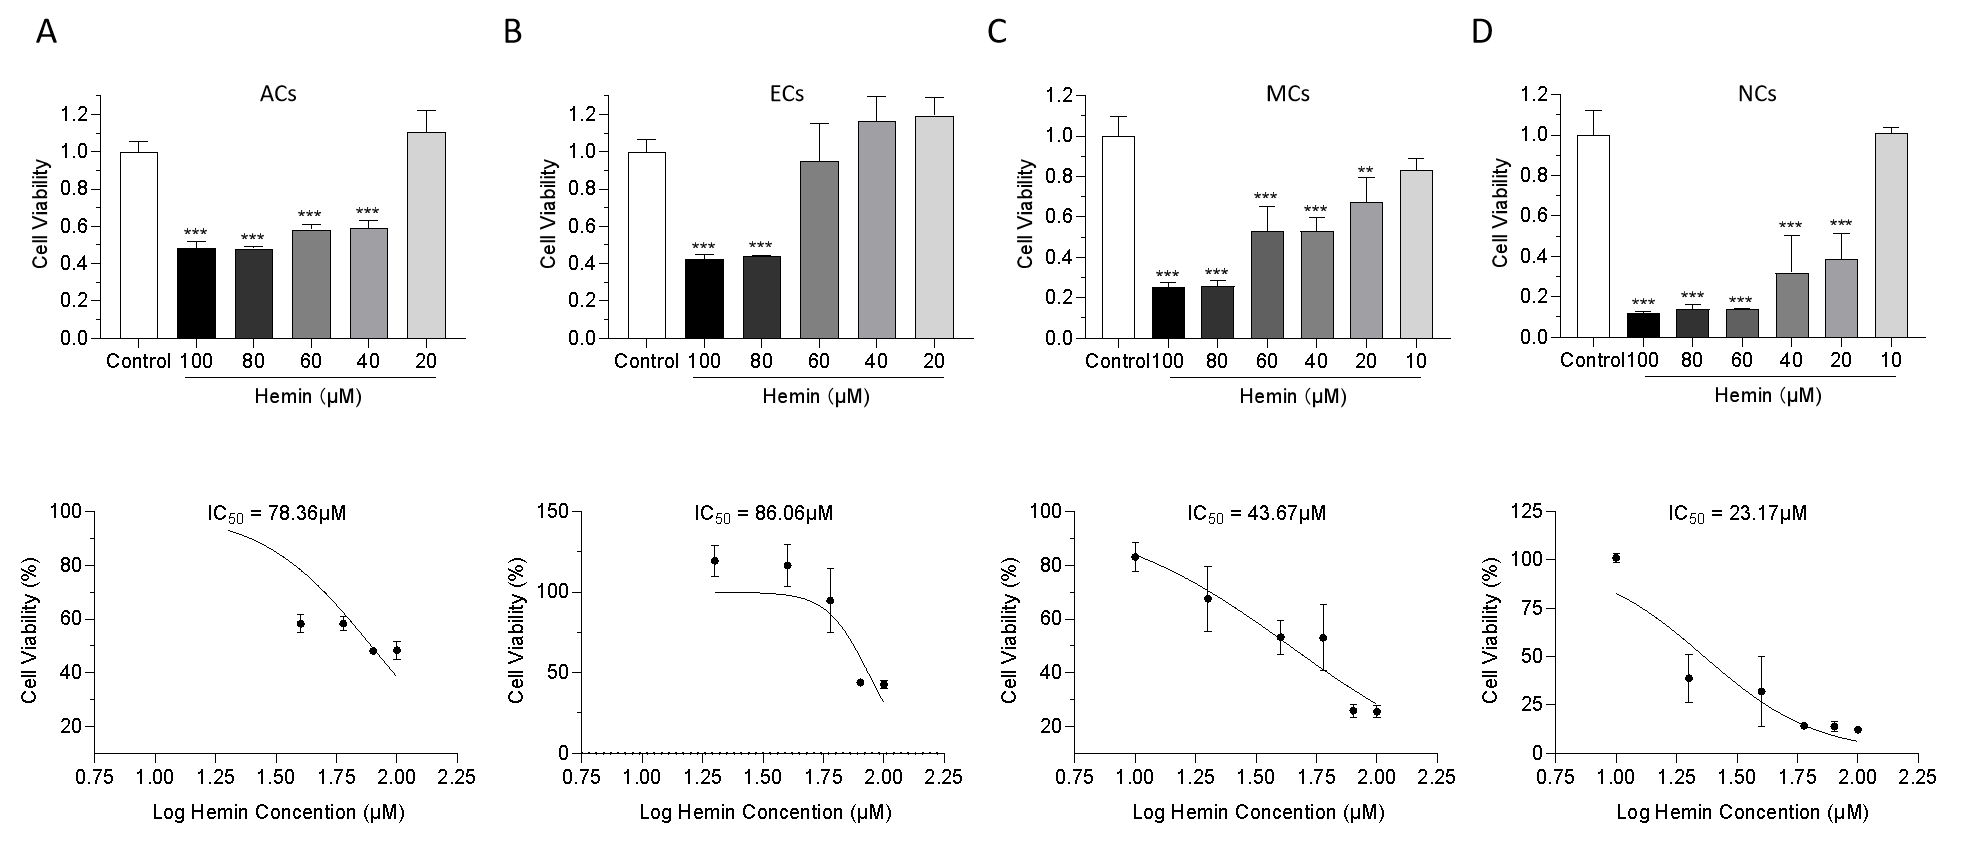


Figure S1. Dose response curves for Hemin used in constructing the SAH model in various neural cells. Cell viability and IC50 values after culturing astrocytes (A), endothelial cells (B), microglia (C), and neurons (D) with different concentrations of Hemin, n=6. **P*<0.05, ***P*<0.01, ****P*<0.001.


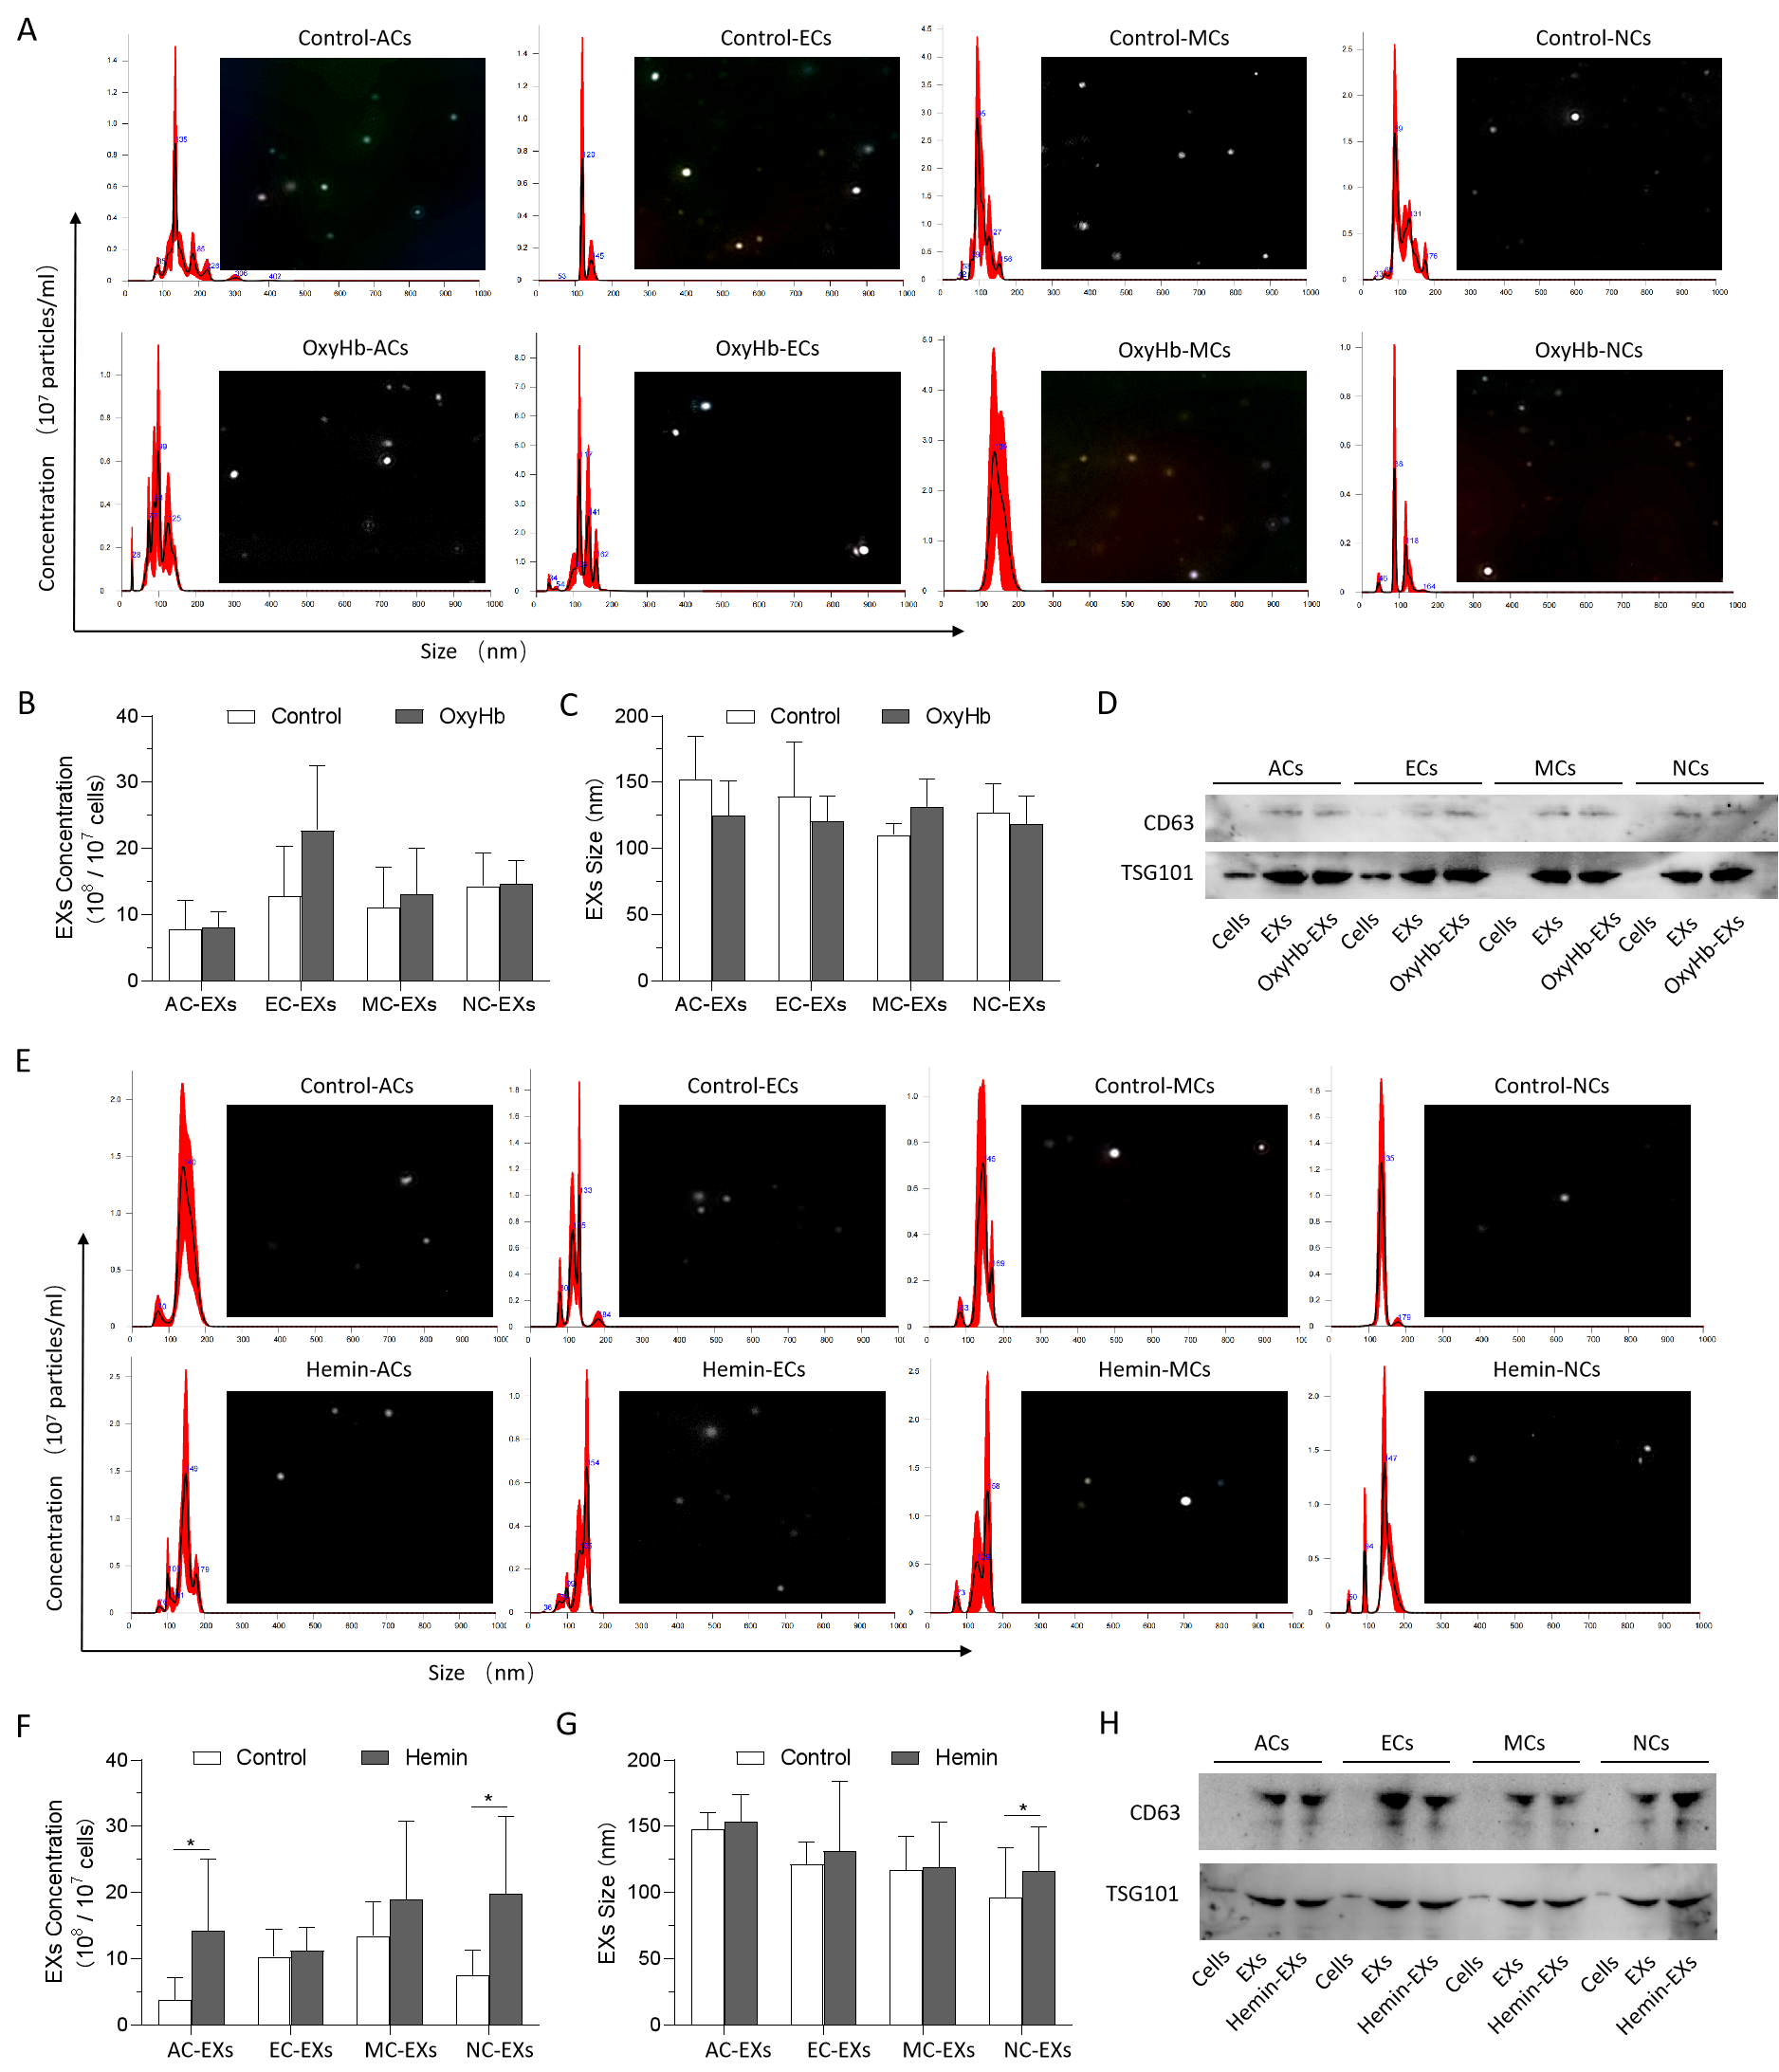


Figure S2. Characterization of exosomes released from microglia, astrocytes, endothelial cells, and neurons after subarachnoid hemorrhage. (A) representative frames and concentration/size graphs from NTA of EXs in each group; (B) statistical chart of EXs concentration, n=4: (C) statistical chart of EXs size, n=4; (D) western blot of EXs markers CD63 and TSG101 in different cells and their released EXs; (E) representative frames and concentration/size graphs from NTA of EXs in each group; (F) statistical chart of EXs concentration, n=6: (G) statistical chart of EXs Size, n=6; (H) western blot of EXs markers CD63 and TSG101 in different cells and their released EXs.


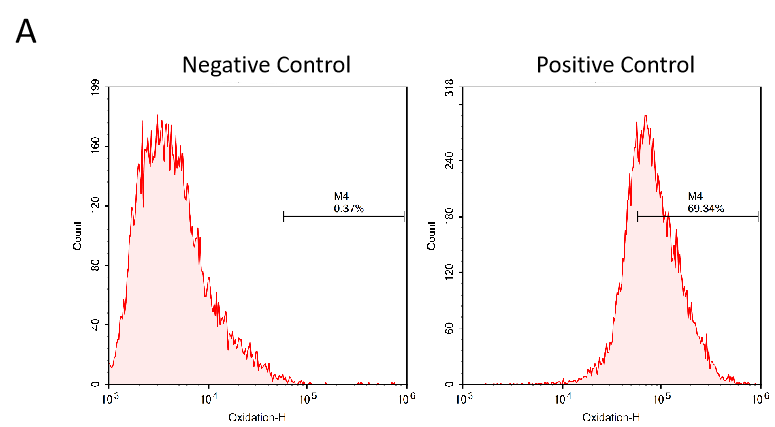


Figure S3. (A) Representative images of negative and positive controls in lipid peroxide staining assays


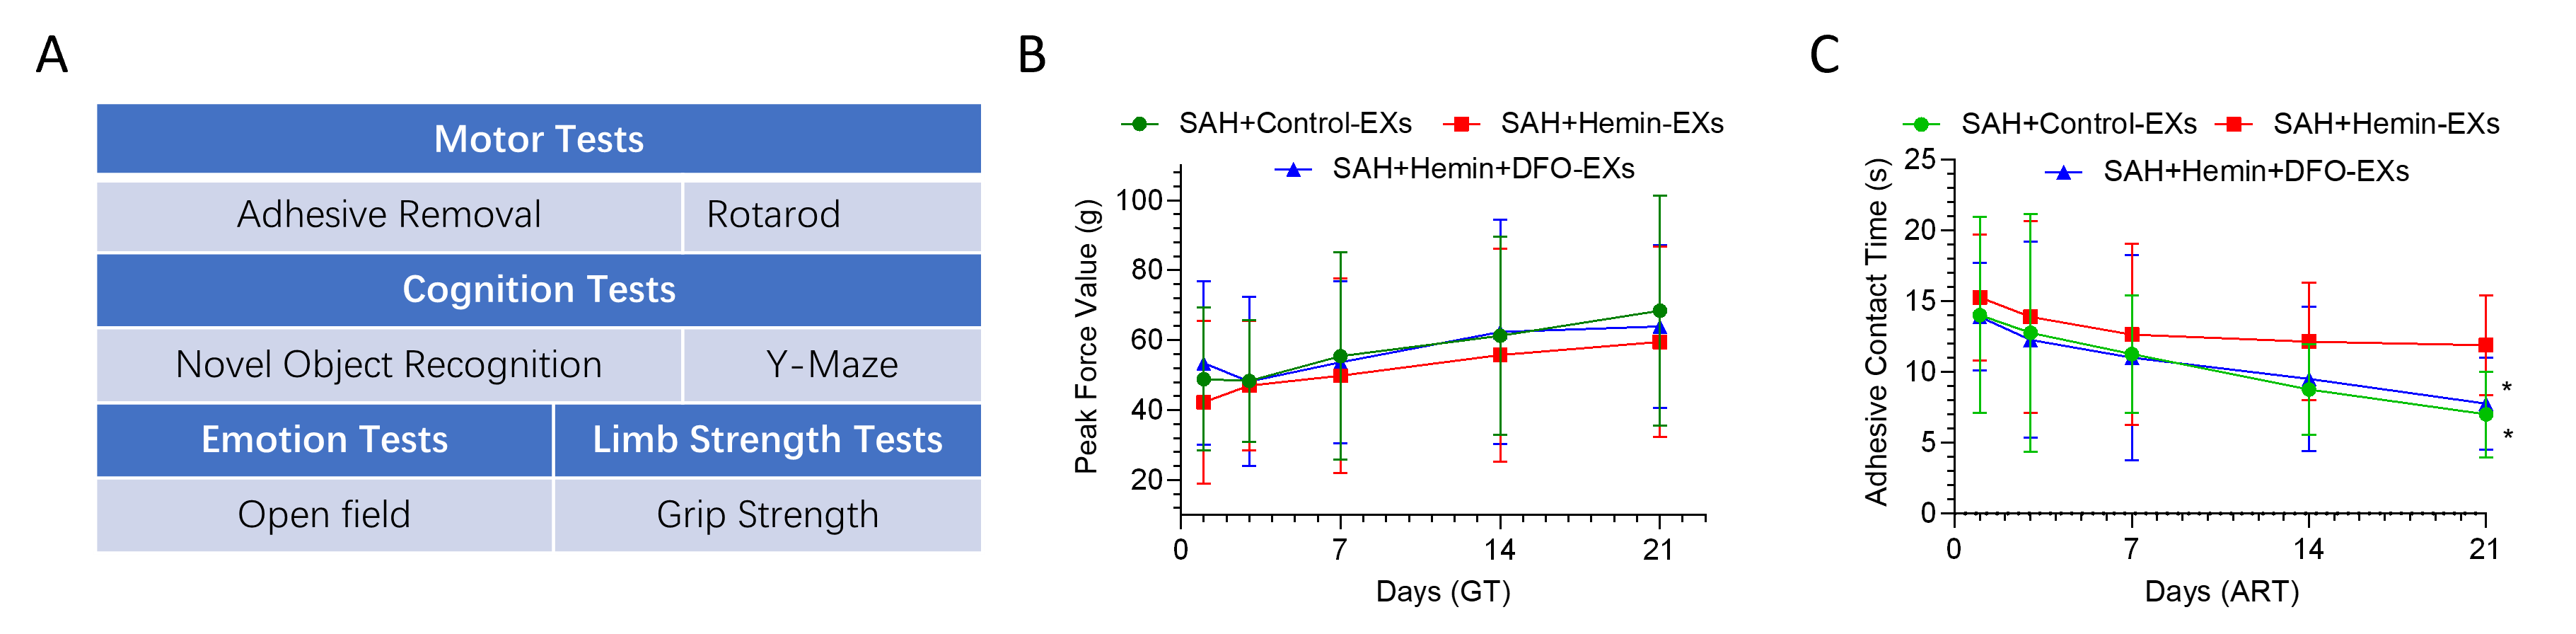


Figure S4. Partial data from the neurological function evaluation. (A) Classification of neurological function assessment methods; compared with the Hemin-EXs group, the use of DFO to remove iron ions had no significant effect on Grip Strength (B), but it could reduce the Adhesive contact time of mice (C). n=10/12 conditioned. **P*<0.05.
